# Supplementary material for: Synthesis of pyrrolo[3′,2′:4,5][1,3]diazepino[2,1,7-cd]pyrrolizine derivatives from dicyanovinylene-bis(meso-aryl)dipyrrin
Source: Royal Society of Chemistry journal article supplement (doi:10.1039/c9ra08850d), 2019-01-01
Supplement: c9ra08850d1.pdf [file c9ra08850d1.pdf]

Supporting information of

**Synthesis of Pyrrolo[3',2':4,5][1,3]diazepino[2,1,7-cd]pyrrolizine Derivative from Dicyanovinylene-bis(*meso*-aryl)dipyrin**

Ji-Young Shin\*

Department of Molecular and Macromolecular Chemistry, Graduate School of Engineering, Nagoya University, Furo-cho, Chikusa-ku, Nagoya 464-8603, Japan. Fax: 81-52-747-6771; E-mail: jyshin@chembio.nagoya-u.ac.jp

**Content**

|                                                                      |       |         |
|----------------------------------------------------------------------|-------|---------|
| 1. NMR spectra of 2 and 3                                            | ----- | page 2  |
| 2. Mass spectra of 2 and 3                                           | ----- | page 7  |
| 3. Crystal structures of 4, 2, and 3                                 | ----- | page 8  |
| 4. Absorption spectra of 2, 3 <sub>ox</sub> , and 3 <sub>red</sub> . | ----- | page 10 |

# 1. NMR spectra of 2 and 3

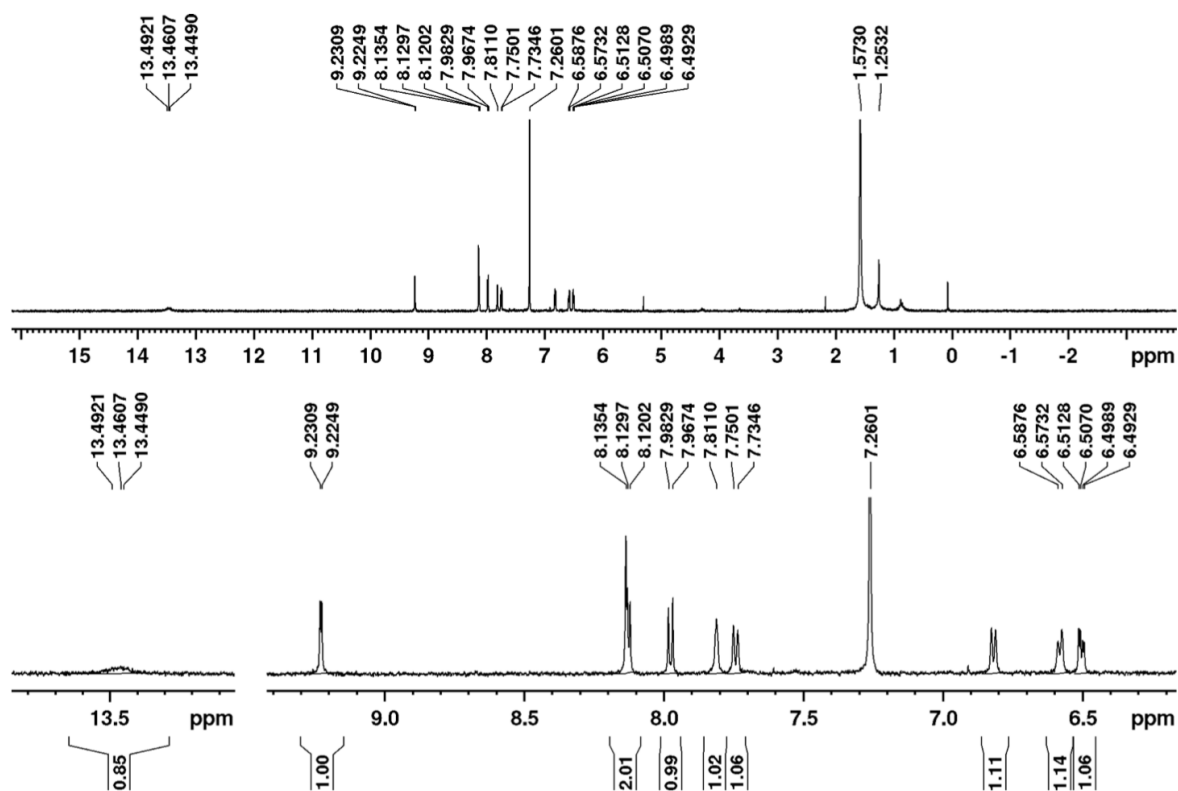

Figure S1.  $^1\text{H}$  NMR (300 MHz) spectrum of **3** in  $\text{CDCl}_3$ .

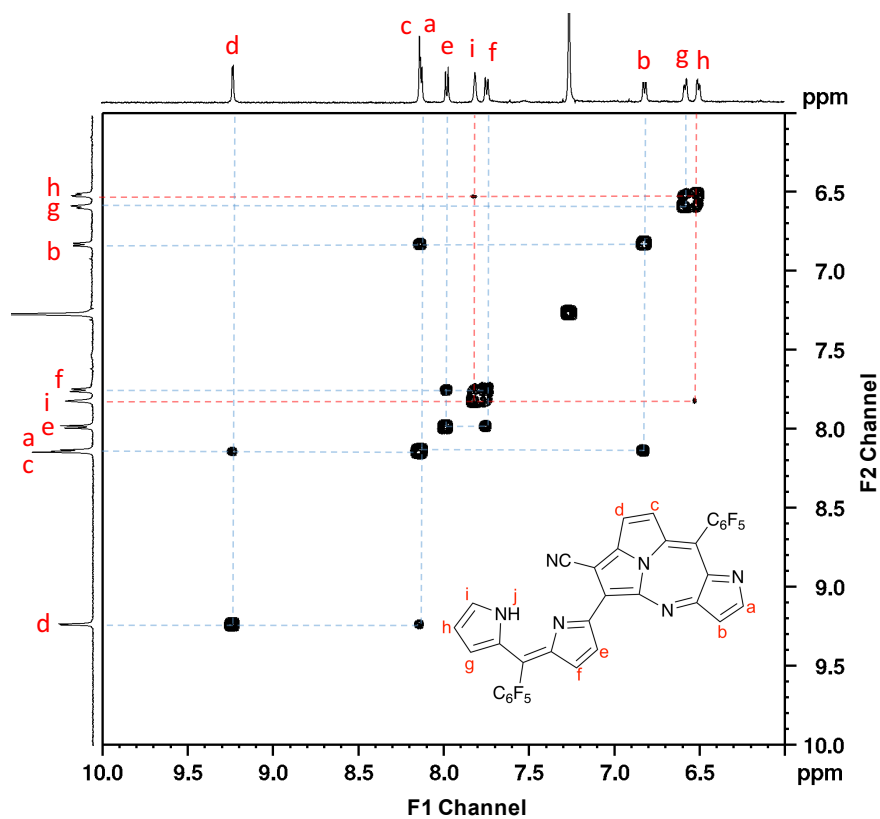

Figure S2. HH COSY ( $F_1 = F_2 = 300$  MHz) NMR spectrum of **3** in  $\text{CDCl}_3$ .

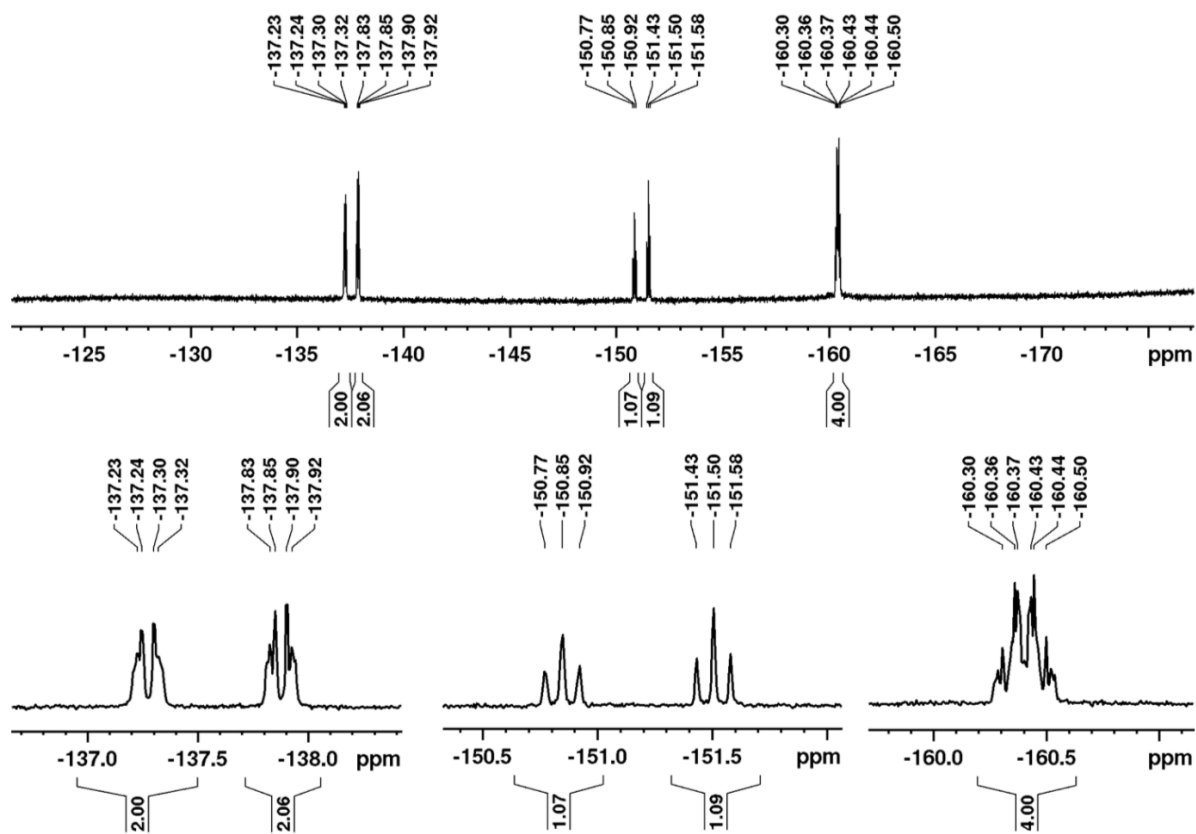

Figure S3.  $^{19}\text{F}$  NMR (282.38 MHz) spectrum of **3** in  $\text{CDCl}_3$ .

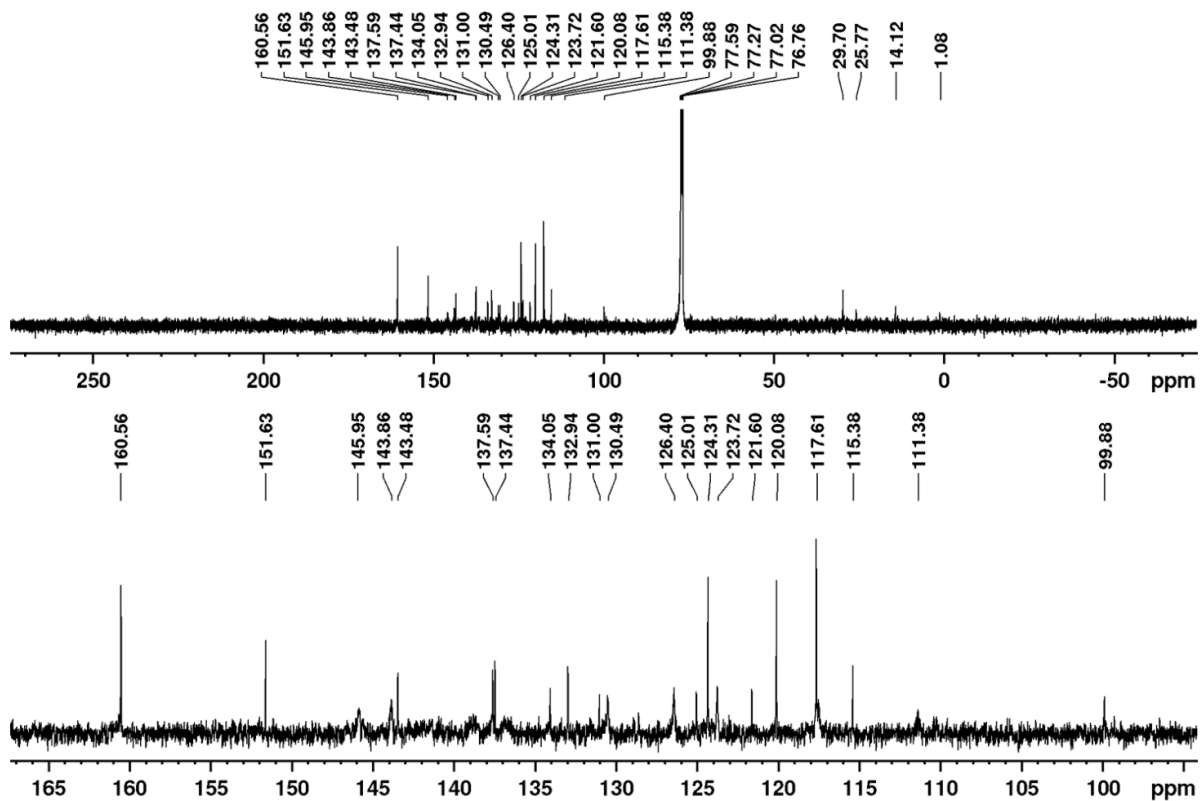

Figure S4.  $^{13}\text{C}$  NMR (125.77 MHz) spectrum of **3** in  $\text{CDCl}_3$ .

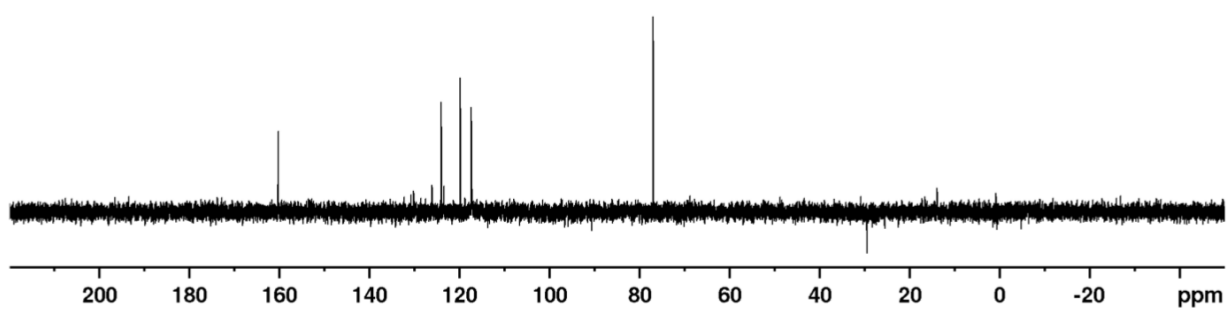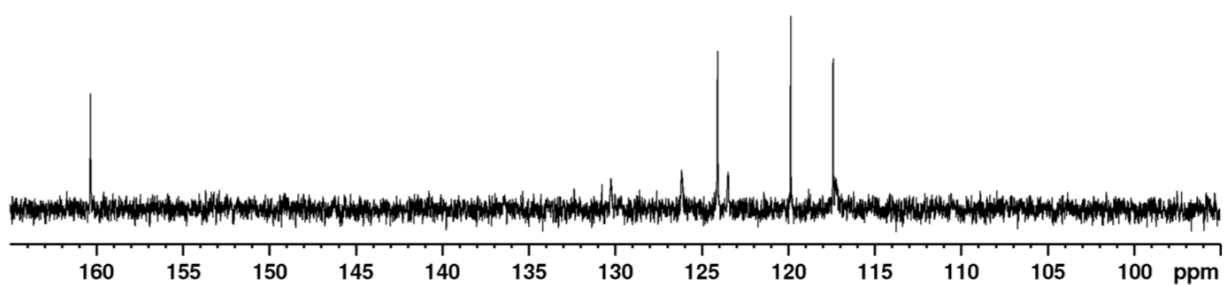

Figure S5. DEPT-135deg NMR (125.77 MHz) spectrum of **3** in CDCl<sub>3</sub>.

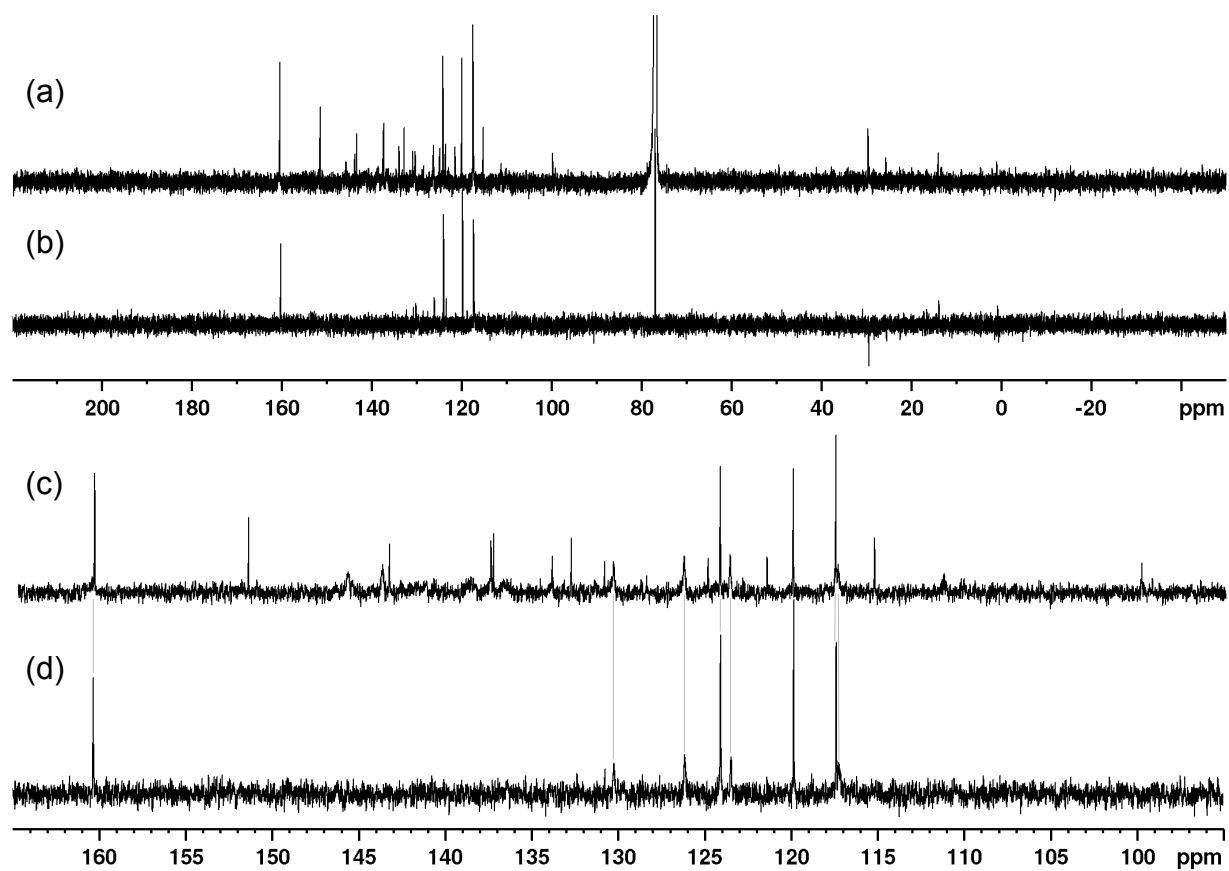

Figure S6. Comparison of carbon peaks between <sup>13</sup>C (a and c) and DEPT (b and d) NMR (125.77 MHz) spectra of **3** in CDCl<sub>3</sub>.

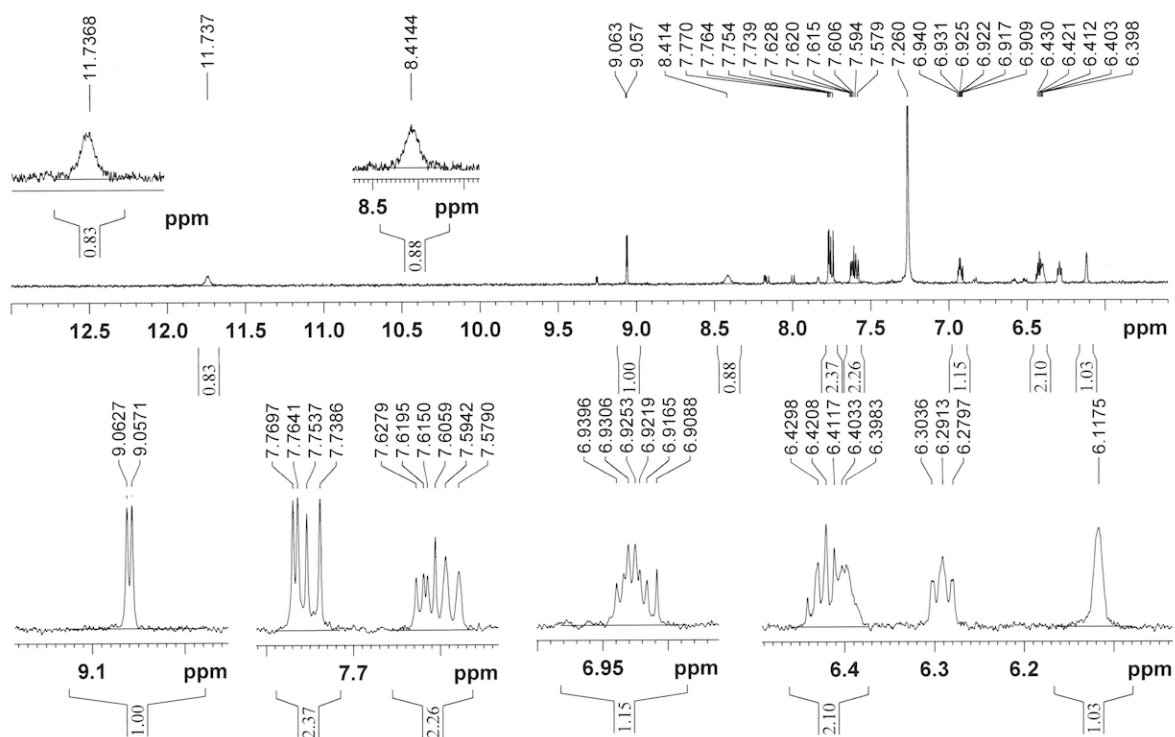

Figure S7.  $^1\text{H}$  NMR (300 MHz) spectrum of **2** in  $\text{CDCl}_3$ .

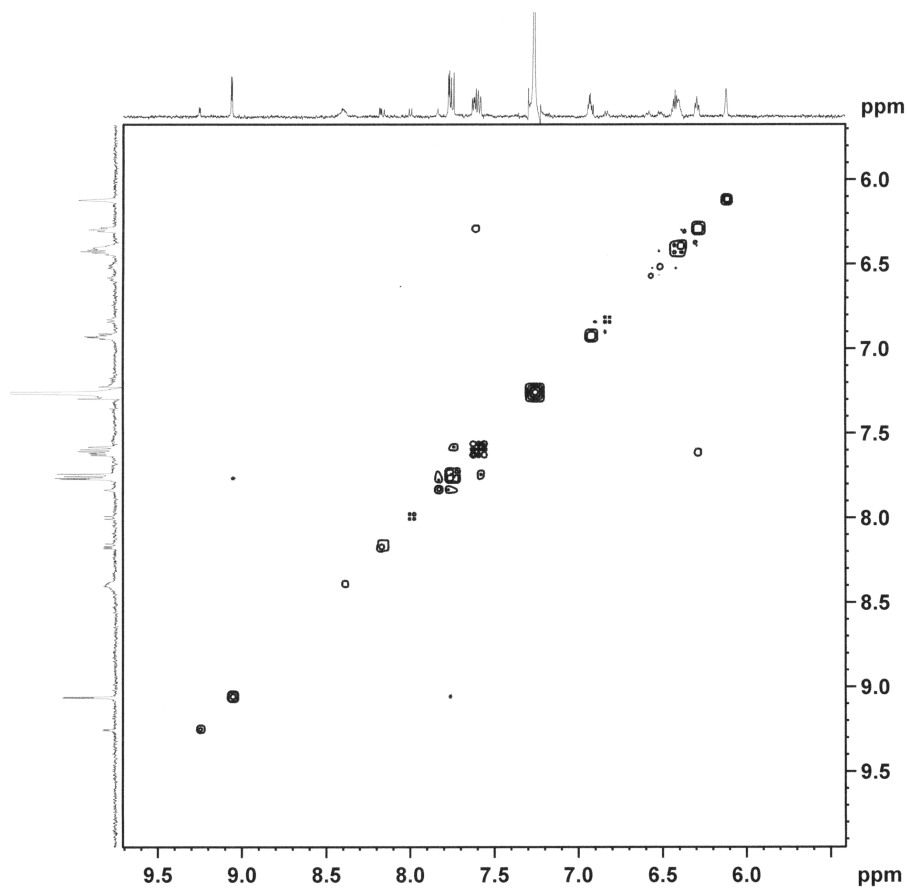

Figure S8. HH COSY ( $F_1 = F_2 = 300$  MHz) NMR spectrum of **2** in  $\text{CDCl}_3$ .

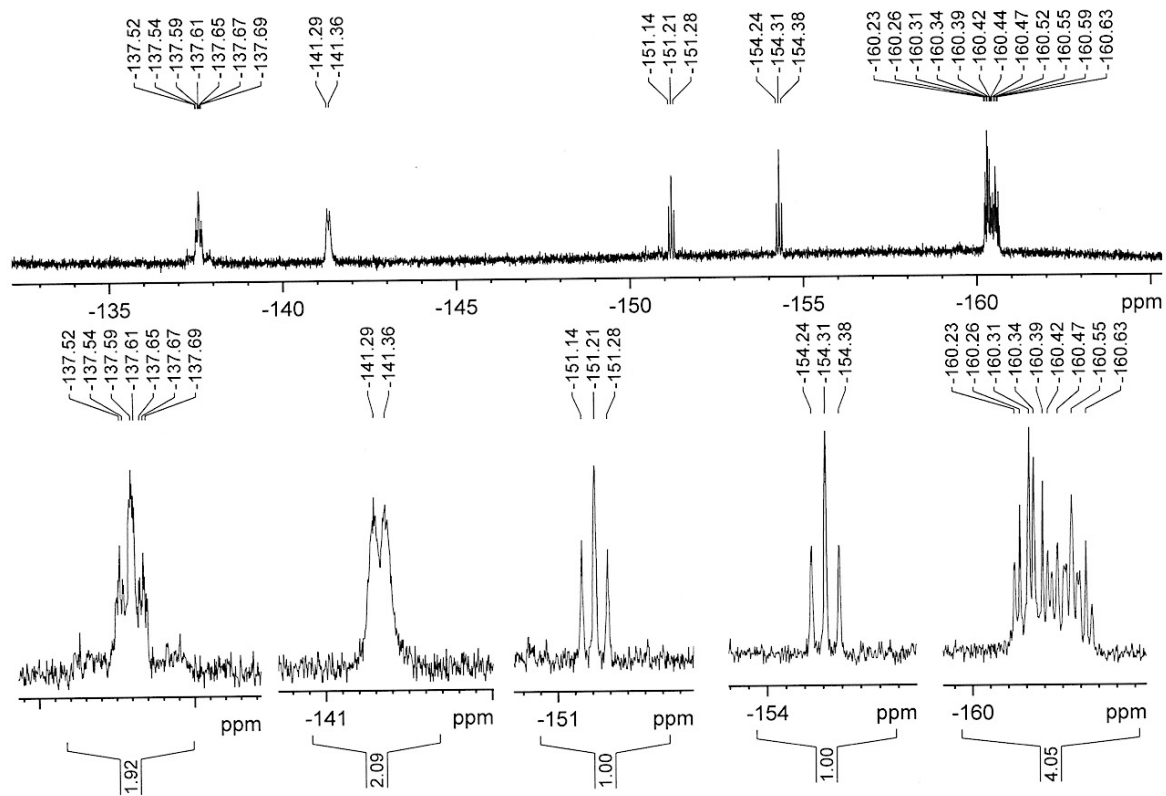

Figure S9.  $^{19}\text{F}$  NMR (282.38 MHz) spectrum of **2** in  $\text{CDCl}_3$ .

## 2. Mass spectra of 2 and 3.

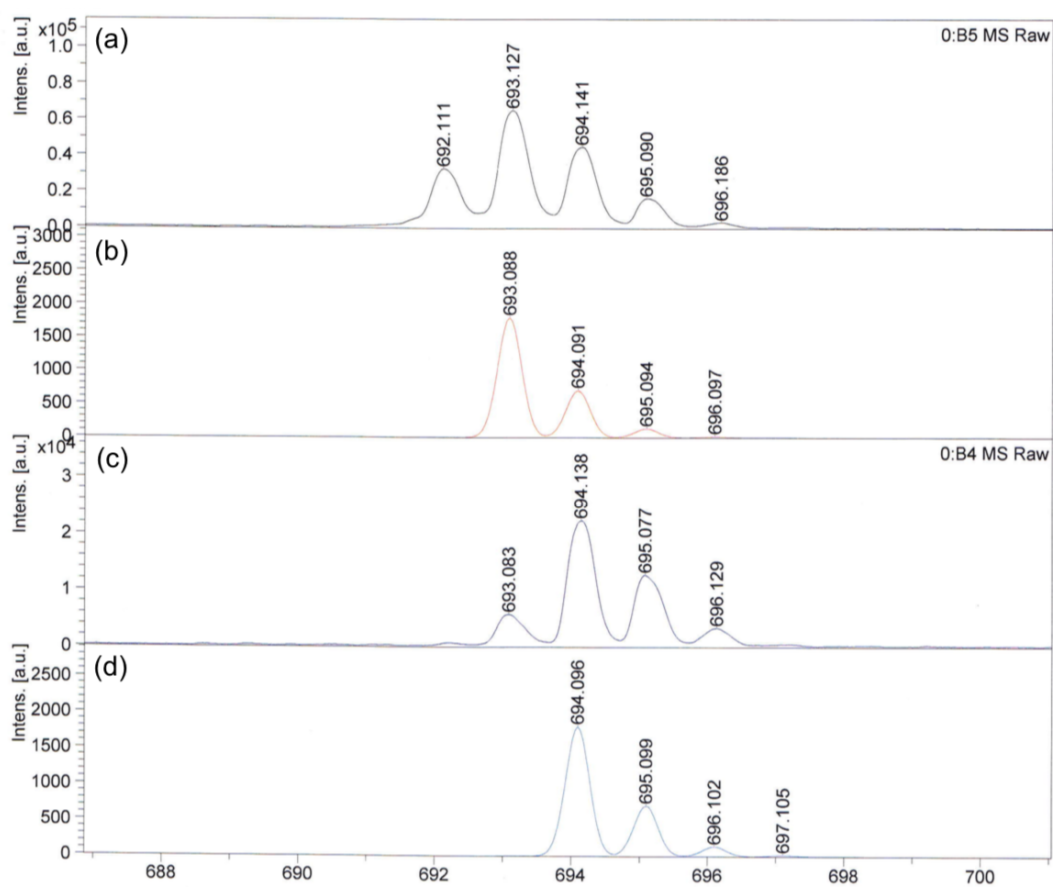

**Figure S10.** MALDI-TOF mass spectra of **3** (a and b) and **2** (c and d): measured (a and c) and calculated (b and d) masses. (b) and (d) are for  $[3 + H]^+$  and  $[2]^+$ .

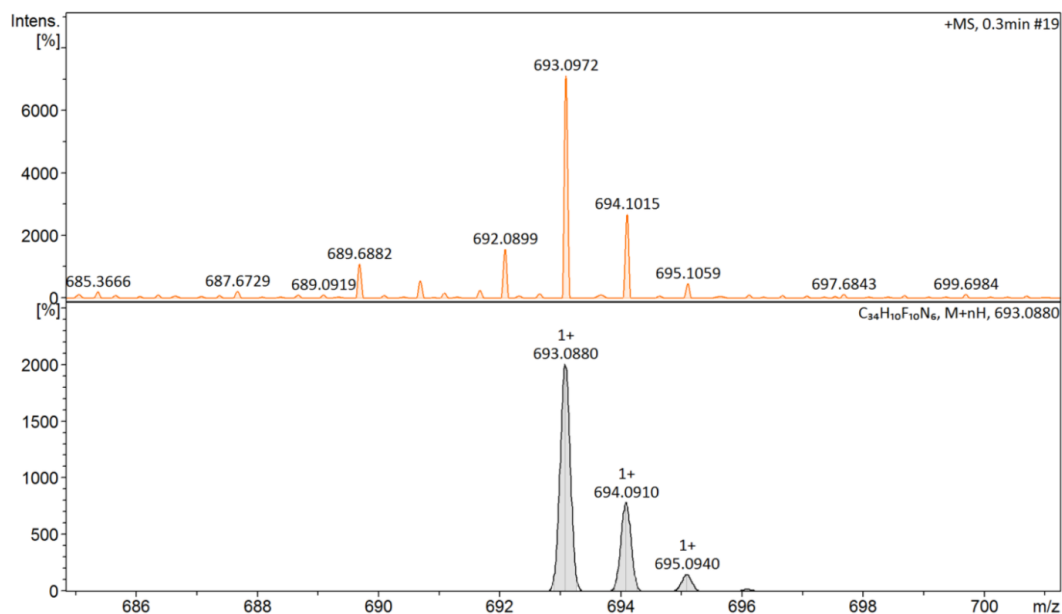

**Figure S11.** High resolution APCI mass spectrum of **3**.

### 3. Crystal structures of 4, 2, and 3.

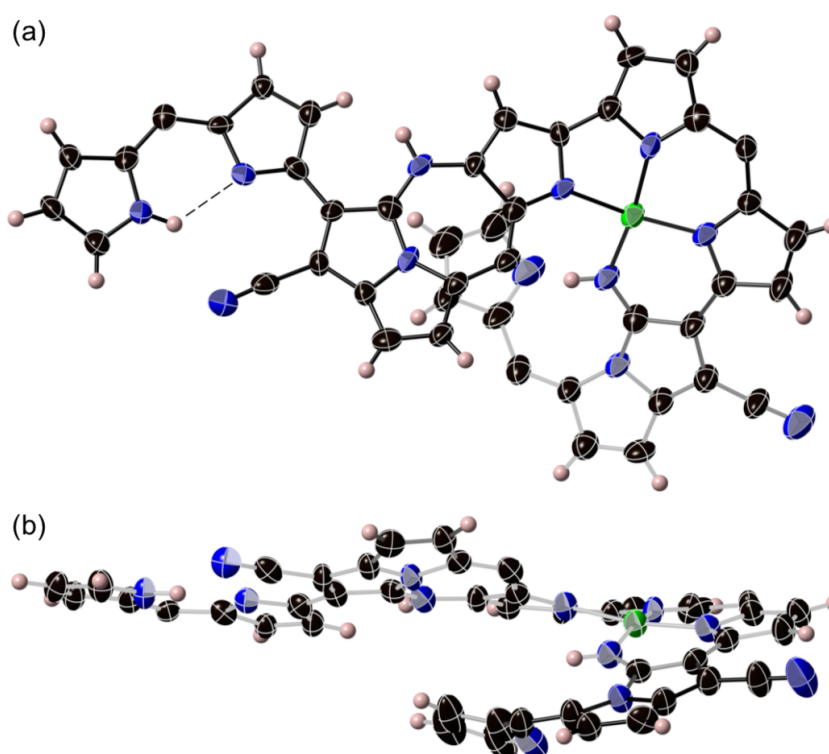

**Figure S12.** Crystal structure of acyclic Ni<sup>II</sup> complex **4** (CCDC No. = 1520688): top view (a) and side view (b). *meso*-Pentafluorophenyl groups were omitted for clarity. Thermal ellipsoids are scaled at the 50% probability level. Crystal data of **4**: (C<sub>68</sub>H<sub>20</sub>F<sub>20</sub>N<sub>12</sub>Ni<sub>2</sub>)<sub>2</sub>·(N<sub>6</sub>Ni<sub>14</sub>) *M<sub>r</sub>* = 2973.51, *T* = 93(2) K, Crystal size = 0.04 x 0.03 x 0.03 mm<sup>3</sup>, Mo radiation, triclinic, space group *P*-1 (#2), *a* = 16.0744(7) Å, *b* = 16.7126(6) Å, *c* = 26.6119(10) Å, *α* = 105.829(3)°, *β* = 103.161(4)°, *γ* = 97.511(3)°, *V* = 6554.0(5) Å<sup>3</sup>, *Z* = 2, *P<sub>calcd.</sub>* = 1.507 g/cm<sup>3</sup>, *R*<sub>1</sub>(*F*) = 0.1124 (*I* > 2(*I*)), *wR*<sub>2</sub>(*F*<sup>2</sup>) = 0.3732 (all), GoF = 1.023, Data completeness = 0.965.

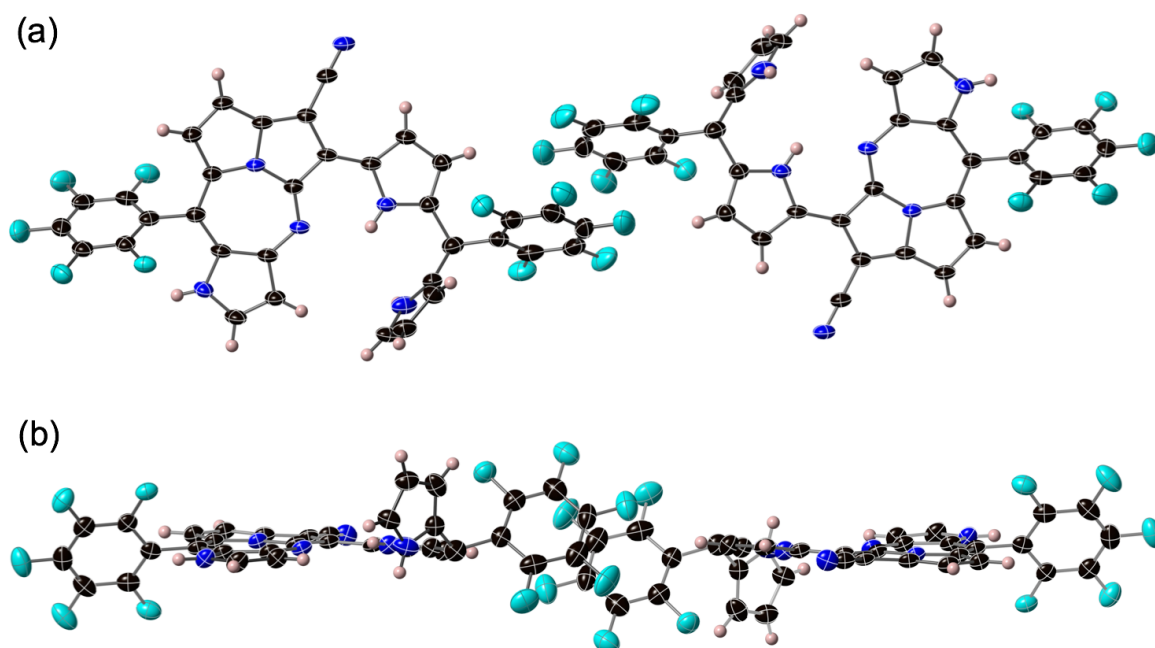

**Figure S13.** Crystal structure of **2**: top view (a) and side views (b). Thermal ellipsoids are scaled at the 50% probability level.



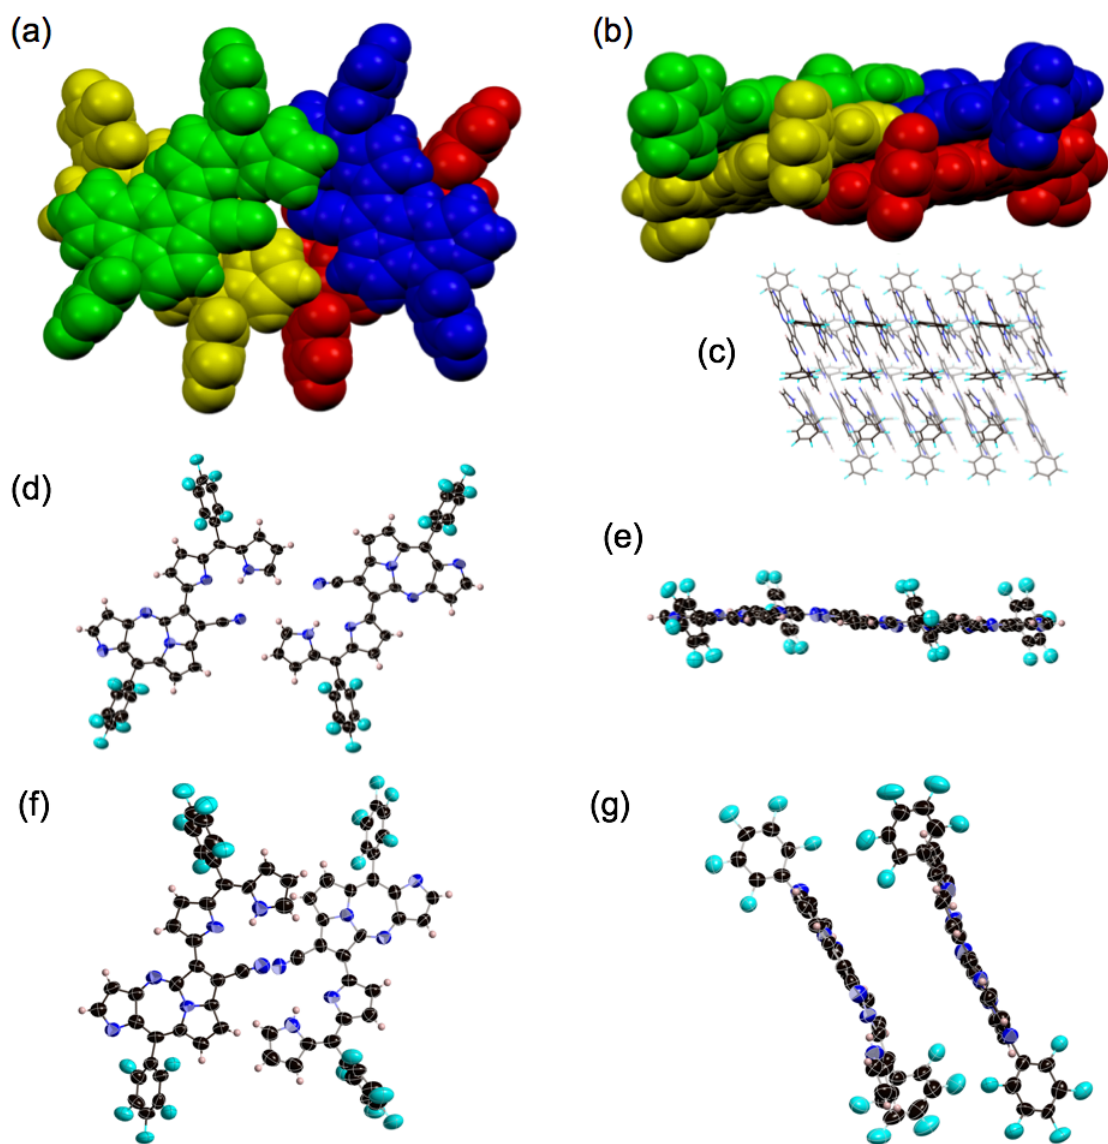

**Figure S14.** Unit-packing diagrams of **3**: Space-filling structures of top (a) and side (b) views and stick model structure showing a packing pattern. The unit presented a combination of two sets of enantiomers: (d) and (f) are the top view for each of the enantiomers and e and g are their side views, respectively.

4. Absorption spectra of **2**, **3<sub>ox</sub>**, and **3<sub>red</sub>**.

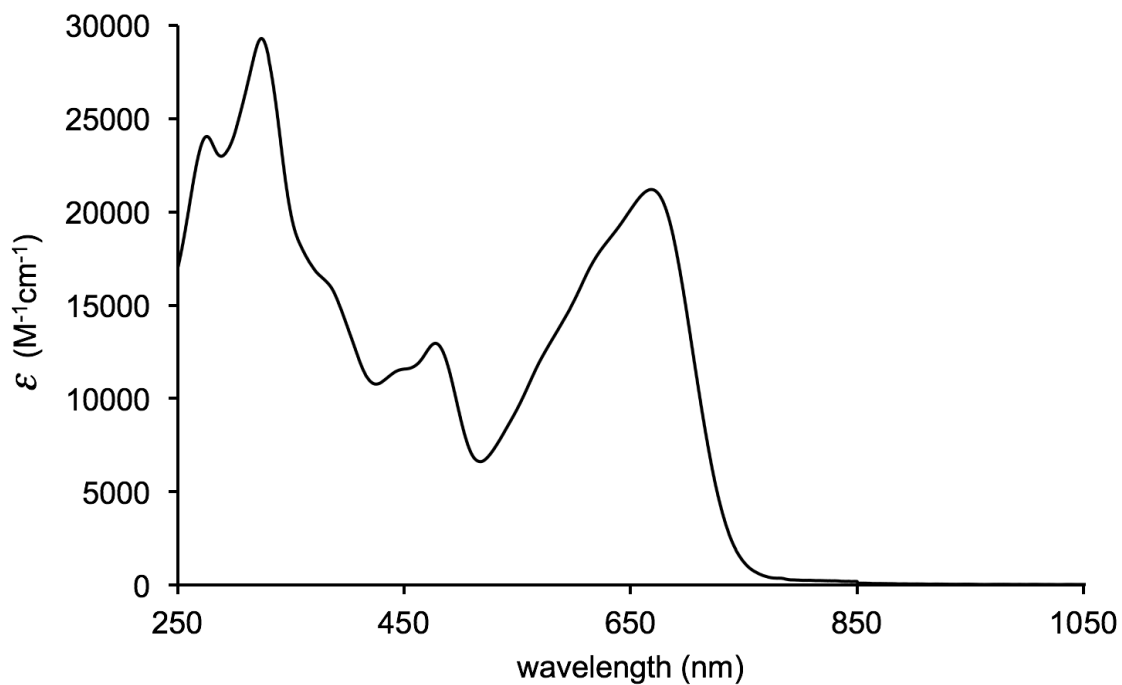

Figure S15. UV Absorption spectrum of **3** in  $CH_2Cl_2$ .

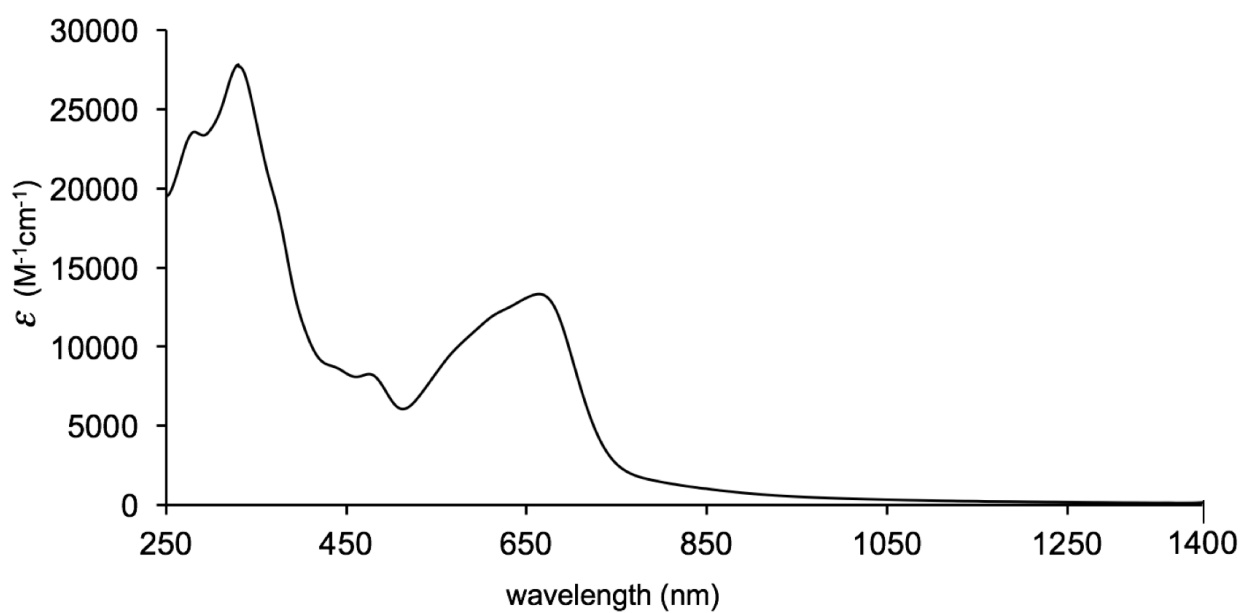

Figure S16. UV Absorption spectrum of **2** in  $CH_2Cl_2$ .

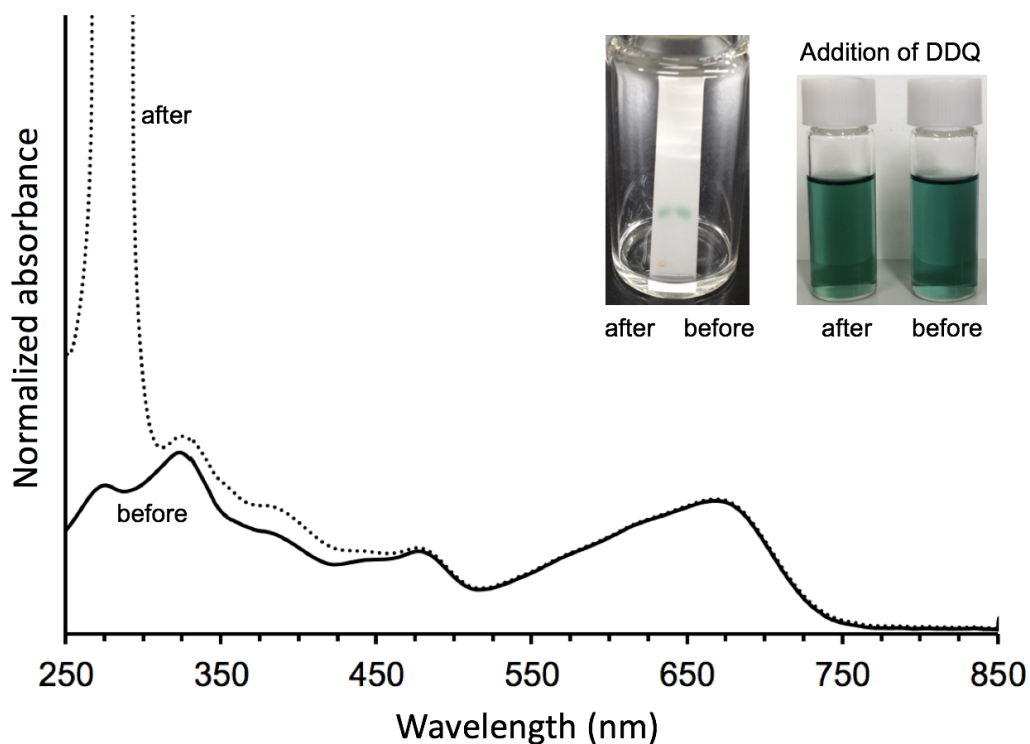

**Figure S17.** Examine of absorption dependence on a chemical oxidation with DDQ: UV absorption spectra of **3** in  $\text{CH}_2\text{Cl}_2$ , before (—) and after (·····) addition of excess DDQ. Any significant difference between two samples was observed: The solutions exhibited same green in color as well as exactly same retention time on TLC plate (silica gel with neat  $\text{CH}_2\text{Cl}_2$ ).

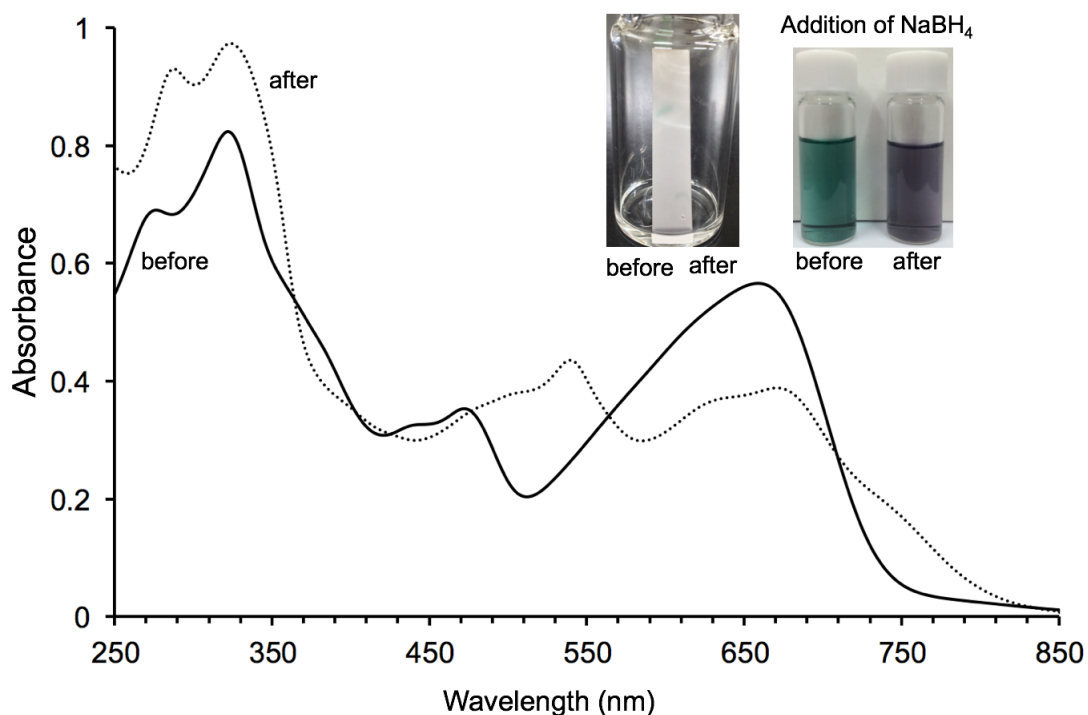

**Figure S18.** Examine of absorption dependence on a chemical reduction with  $\text{NaBH}_4$ : UV absorption spectra of **3** in  $\text{CH}_3\text{OH}$ , before (—) and after (·····) addition of excess  $\text{NaBH}_4$ . The initial green was changed to violet in color. Retention time on TLC plate increased with the chemical reduction (silica gel with  $\text{CH}_2\text{Cl}_2$  including tiny amount of  $\text{CH}_3\text{OH}$ ).
